# Supplementary material for: Optogenetically induced low-frequency correlations impair perception
Source: eLife journal article supplement (doi:10.7554/elife.35123), 2019-02-22
Supplement: supp [file elife-35123-supp-v1.zip]

Archive with 13 entries (13 files):
- elife_poa_e35123_Figure_2_figure_supplement_1.pdf
- elife_poa_e35123_Figure_4_figure_supplement_4.pdf
- elife_poa_e35123_Figure_2_figure_supplement_2.pdf
- elife_poa_e35123_Figure_2_figure_supplement_5.pdf
- elife_poa_e35123_Figure_4_figure_supplement_2.pdf
- elife_poa_e35123_Figure_2_figure_supplement_4.pdf
- elife_poa_e35123_Figure_2_figure_supplement_3.pdf
- elife_poa_e35123_Figure_4_figure_supplement_3.pdf
- elife_poa_e35123_Figure_4_figure_supplement_1.pdf
- elife_poa_e35123_Transparent_Reporting_File.docx
- elife_poa_e35123_Figure_4_figure_supplement_5.pdf
- elife_poa_e35123_Figure_6_figure_supplement_2.pdf
- elife_poa_e35123_Figure_6_figure_supplement_1.pdf
