# Supplementary material for: Optogenetically induced low-frequency correlations impair perception
Source: eLife journal article supplement (doi:10.7554/elife.35123), 2019-02-22
Supplement: supp [file elife-35123-supp-v1.zip › elife_poa_e35123_Figure_2_figure_supplement_1.pdf]

Figure 2 - Supplementary 1 NANDY

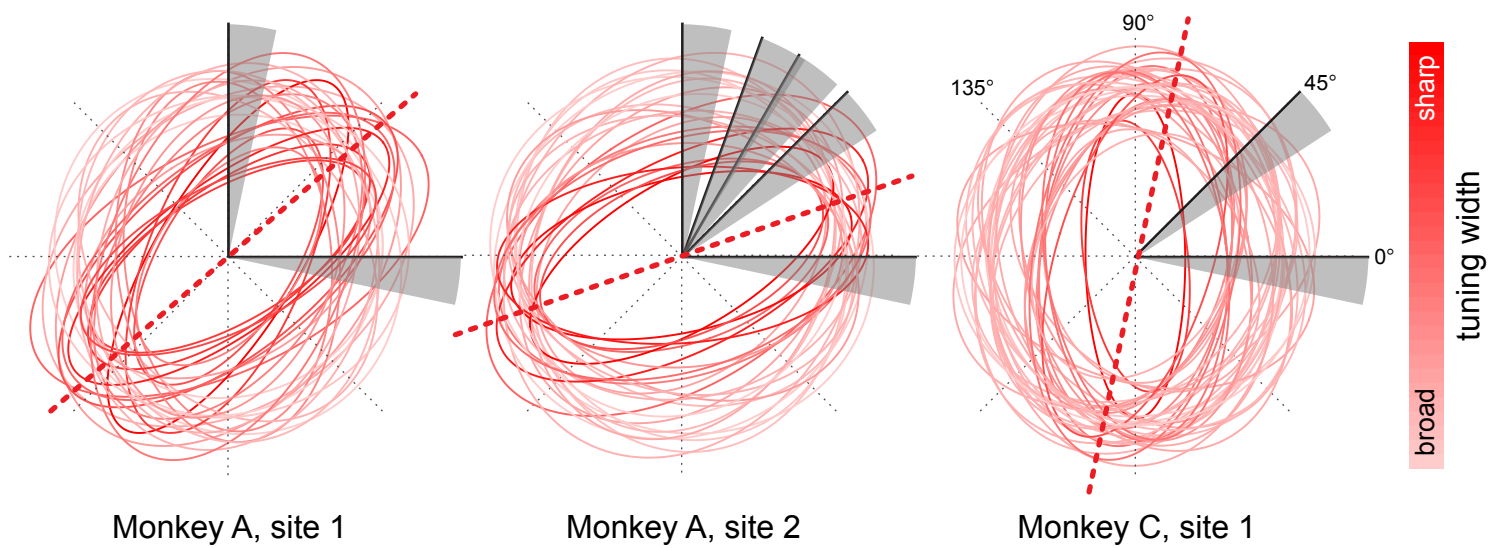

**Fig 2 - Supp 1. Orientation tuning properties at opsin injection sites.** Orientation tuning plots of single units and multi-unit activity at the different cortical injection sites (2 in monkey A, 1 in monkey C) were fitted with ellipses (least-squares fit). The fitted ellipses are overlaid to illustrate the overlap in tuning at each injection site. The ellipses are color-coded such that more saturated colors correspond to units with sharper orientation tuning, as estimated from the aspect ratio of the fitted ellipse. The dotted red lines represent the average peak tuning at each site. The gray sectors represent the range of orientation changes that the monkeys had to detect with respect to baseline orientation (black line within each sector) across different behavioral sessions.
