# Supplementary material for: Optogenetically induced low-frequency correlations impair perception
Source: eLife journal article supplement (doi:10.7554/elife.35123), 2019-02-22
Supplement: supp [file elife-35123-supp-v1.zip › elife_poa_e35123_Figure_2_figure_supplement_2.pdf]

Figure 2 - Supplementary 2 NANDY

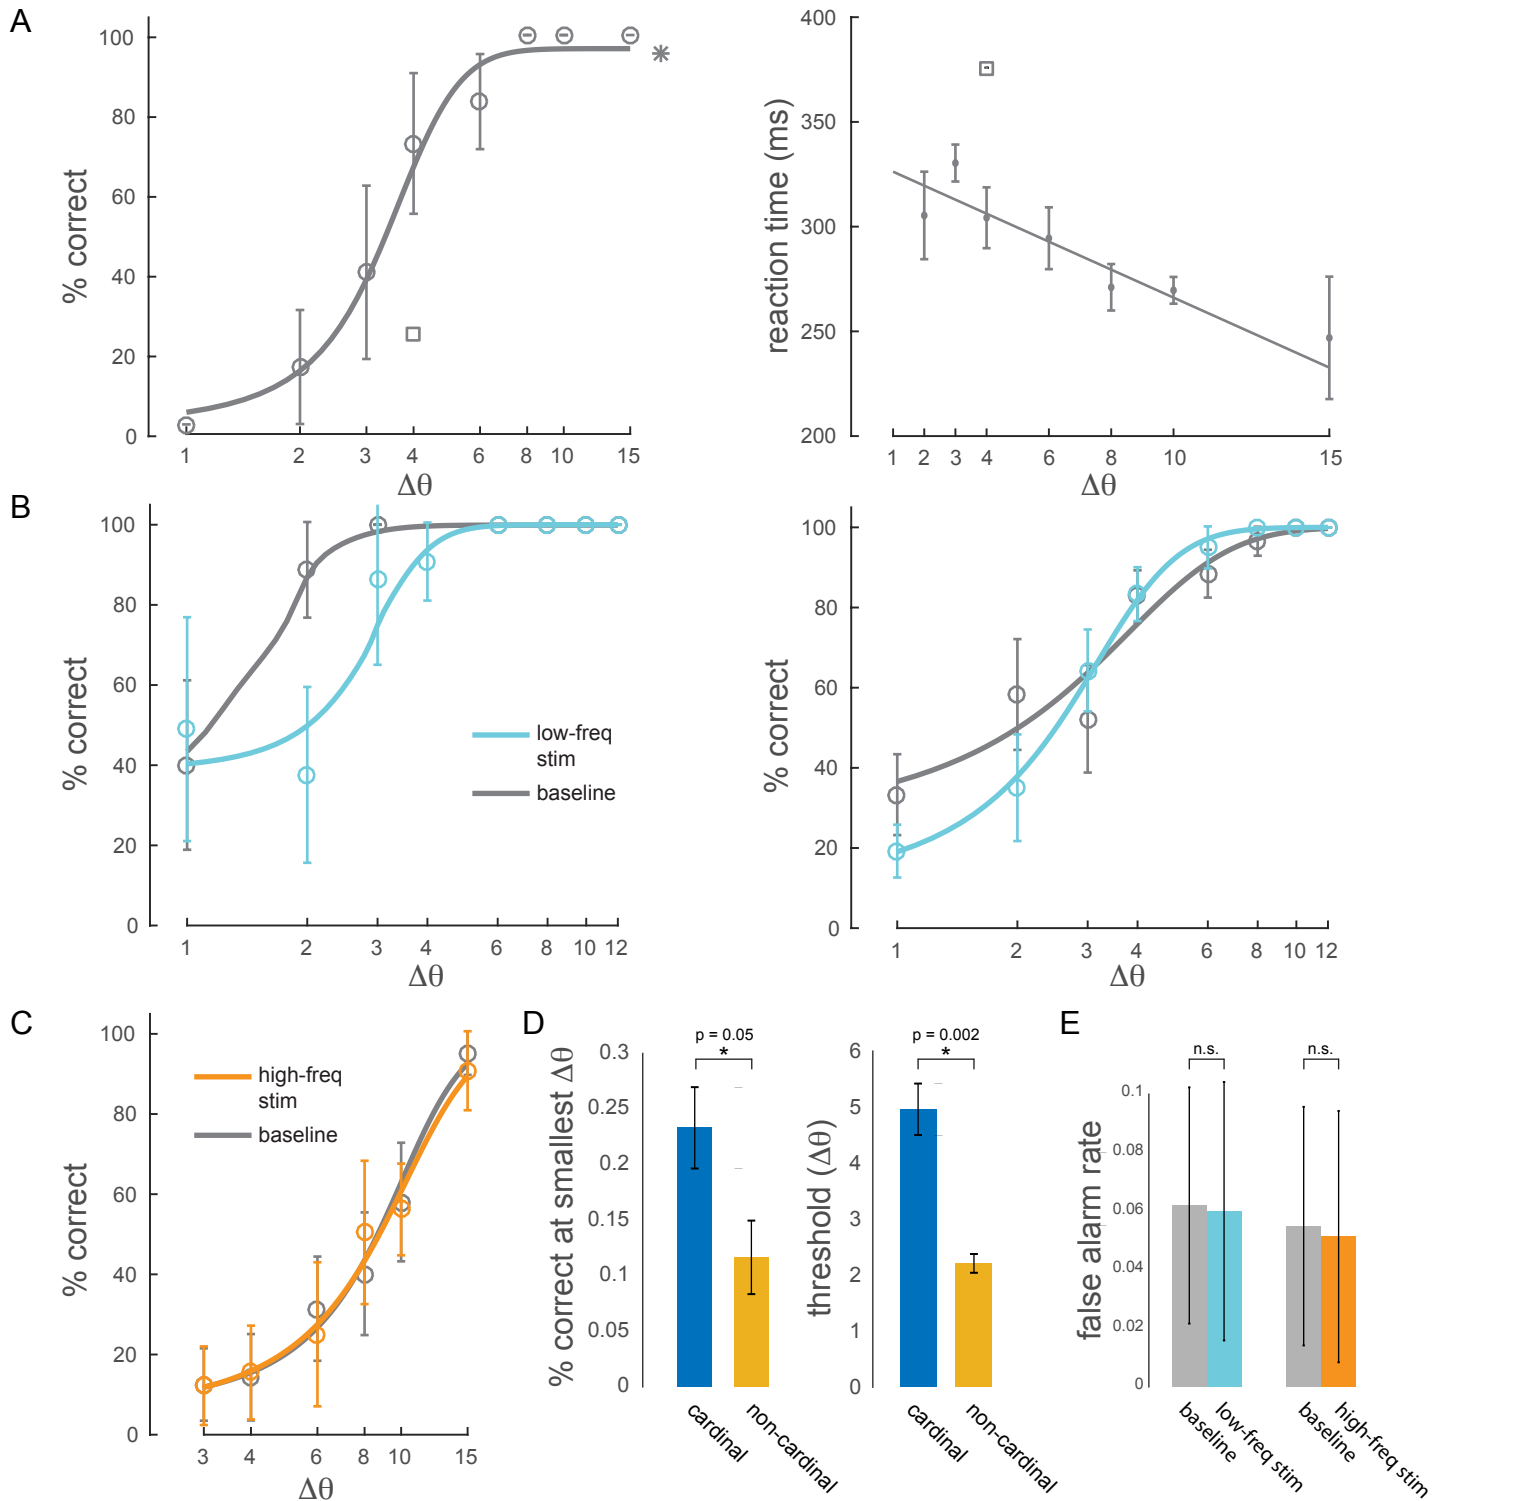

**Fig 2 - Supp 2. Behavioral performance.** (A) *Left panel*: example behavioral session showing performance (hit rate) as a function of task difficulty (size of orientation change) for the baseline condition (no optical stimulation). Square symbol: foil trial performance. Star symbol: catch trial performance. Error bars are std. dev. obtained by a jackknife procedure and corrected for the number of jackknives (20). The data has been fitted with a smooth logistic function. *Right panel*: reaction time as a function of task difficulty for the same session. The data has been fitted with a linear regression line. Performance is degraded and reaction times are slower for the foil trials, indicating that the animal was indeed deploying attention to the spatially cued location. (B) Two example sessions showing a behavioral impairment due to low-frequency (4-5Hz) optical stimulation when the monkey was attending in to the site of optical stimulation. Same format as in Fig 2B, top panel. (C) Example behavioral session showing no change in performance due to high-frequency (20Hz) optical stimulation. (D) Performance at the smallest target orientation change and discrimination thresholds for cardinal ( $0^\circ$ ,  $90^\circ$ ) and non-cardinal non-target orientations. Mean  $\pm$  s.e.m. (E) False alarm rates for baseline, low-frequency stimulation and high-frequency stimulation conditions. (n=42 sessions for low-frequency; n=15 sessions for high-frequency)
