# Supplementary material for: Optogenetically induced low-frequency correlations impair perception
Source: eLife journal article supplement (doi:10.7554/elife.35123), 2019-02-22
Supplement: supp [file elife-35123-supp-v1.zip › elife_poa_e35123_Figure_2_figure_supplement_3.pdf]

Figure 2 - Supplementary 3 NANDY

A

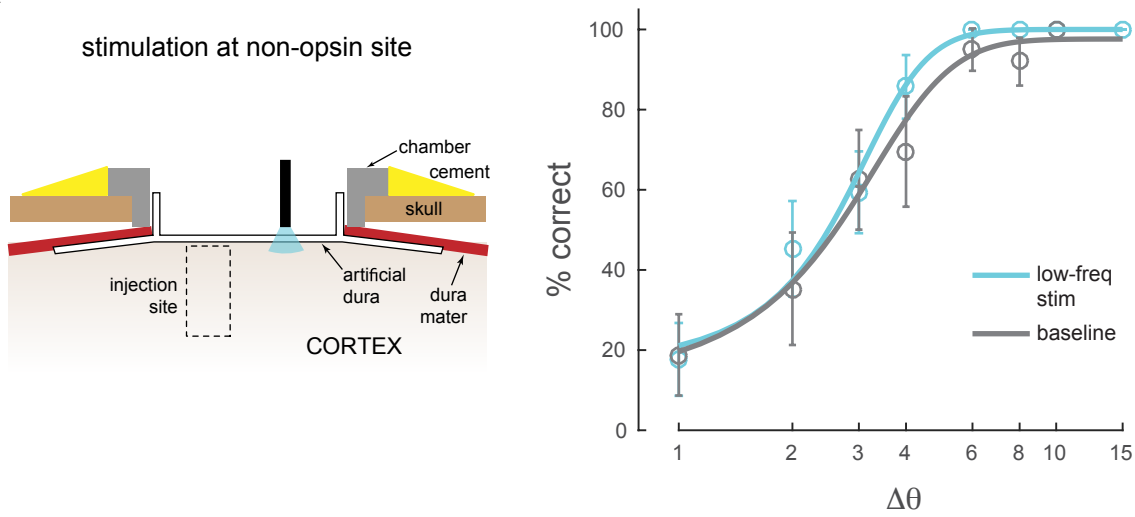

B

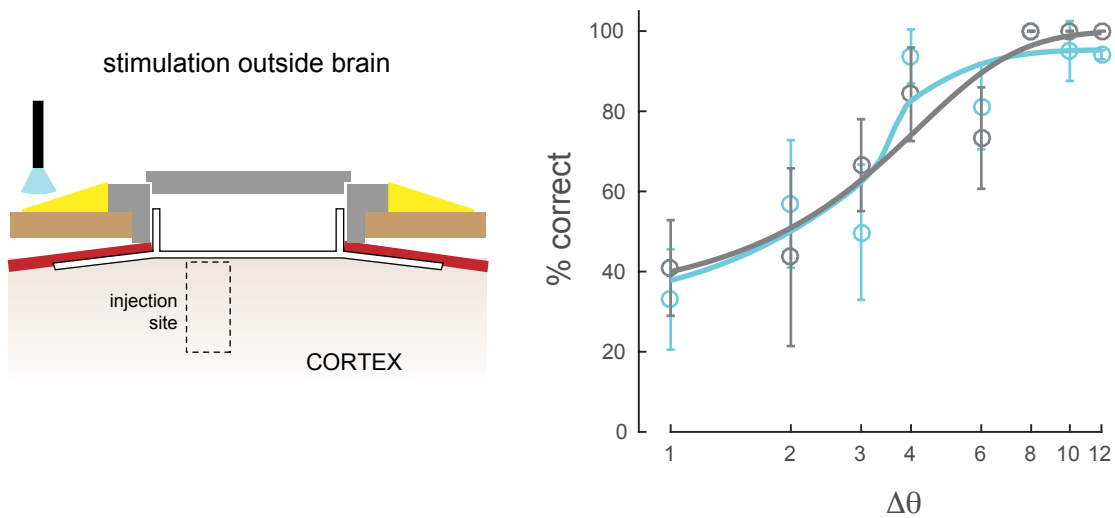

**Fig 2 - Supp 3. Other control conditions.** (A) Stimulation at a non-opsin site does not perturb behavior. (B) Stimulation with optical fiber outside the brain (with the opto-physiology chamber closed) does not perturb behavior.
