# Supplementary material for: Optogenetically induced low-frequency correlations impair perception
Source: eLife journal article supplement (doi:10.7554/elife.35123), 2019-02-22
Supplement: supp [file elife-35123-supp-v1.zip › elife_poa_e35123_Figure_4_figure_supplement_1.pdf]

Figure 4 - Supplementary 1 NANDY

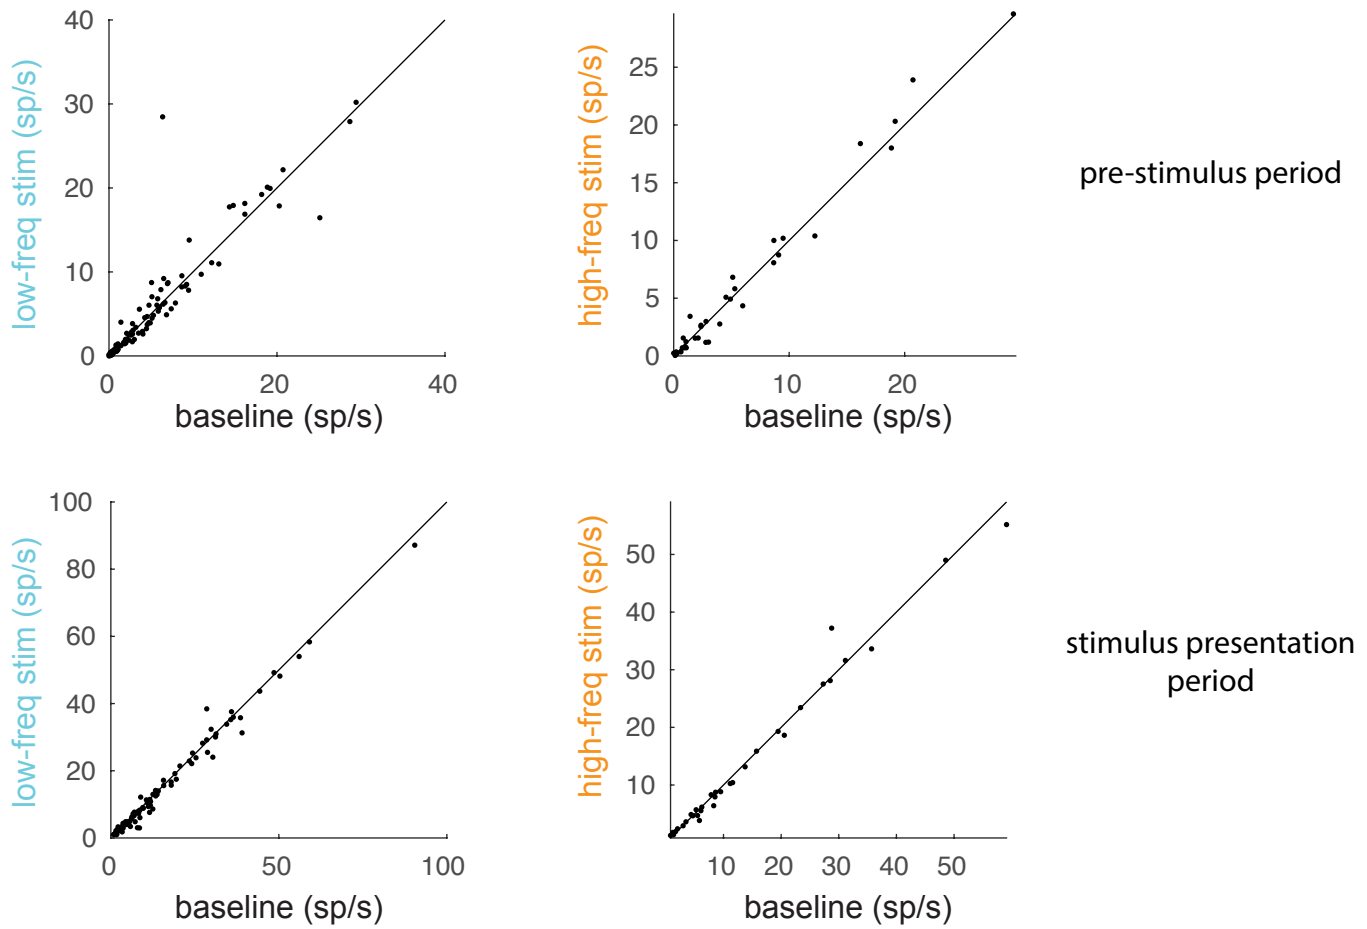

**Fig 4 - Supp 1. Comparison of spike rates between optical stimulation and baseline conditions.** Comparison of spike rates between the optical stimulation conditions (low-frequency: left panels; high-frequency: right panels) and the baseline condition for a 200ms pre-stimulus period (top panels) and 200ms stimulus presentation period (60-260ms after stimulus onset; bottom panels). Each dot represents a unit in the population of recorded units.
