# Supplementary material for: Optogenetically induced low-frequency correlations impair perception
Source: eLife journal article supplement (doi:10.7554/elife.35123), 2019-02-22
Supplement: supp [file elife-35123-supp-v1.zip › elife_poa_e35123_Figure_4_figure_supplement_2.pdf]

Figure 4 - Supplementary 2 NANDY

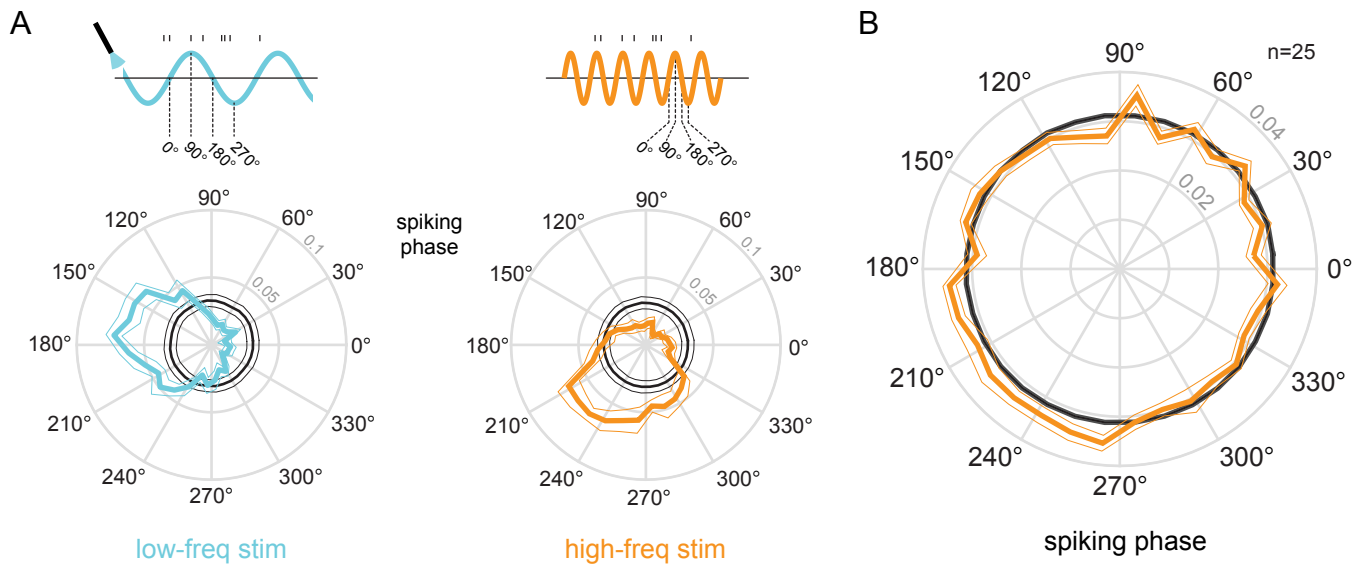

**Fig 4 - Supp 2. Phase-locking to optical stimulation.** (A) Phase plots for an example unit (same as in Supp Fig 3) showing the distribution of spiking activity with respect to the phase of the low-frequency (5Hz, *left*) and high-frequency (20Hz, *right*) optical stimulation. In gray is the null distribution obtained from a rate-matched Poisson process. The unit shows significant deviations from the null distribution, indicative of phase locking to both stimulations ( $p < 0.01$  for both stimulation conditions, Rayleigh test). (B) Population phase-locking plot illustrating the bias in spiking activity to the high-frequency optical stimulation ( $n=25$ ). Same convention as in A.
