# Supplementary material for: Optogenetically induced low-frequency correlations impair perception
Source: eLife journal article supplement (doi:10.7554/elife.35123), 2019-02-22
Supplement: supp [file elife-35123-supp-v1.zip › elife_poa_e35123_Figure_4_figure_supplement_3.pdf]

Figure 4 - Supplementary 3 NANDY

A

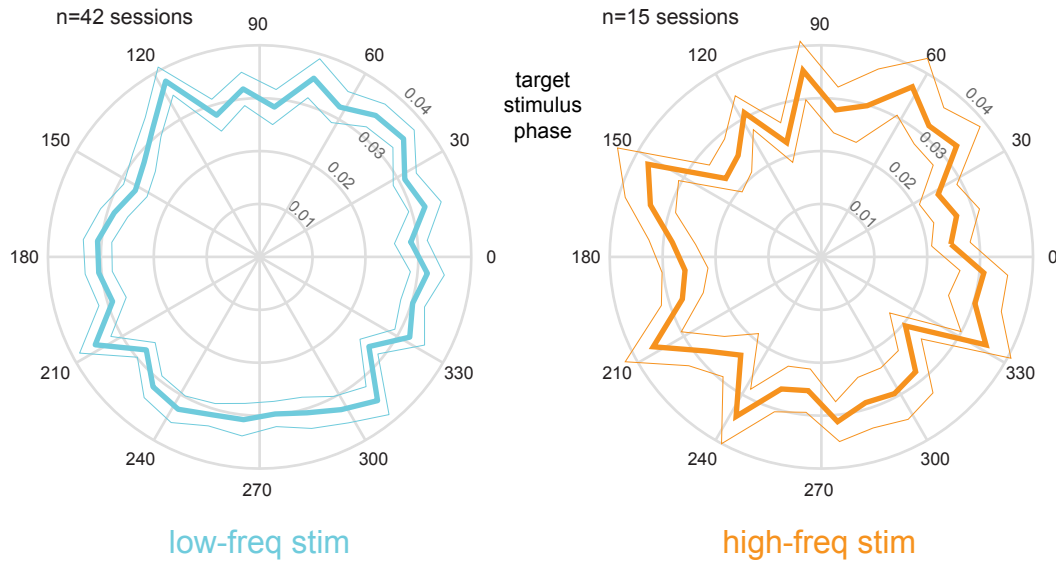

B

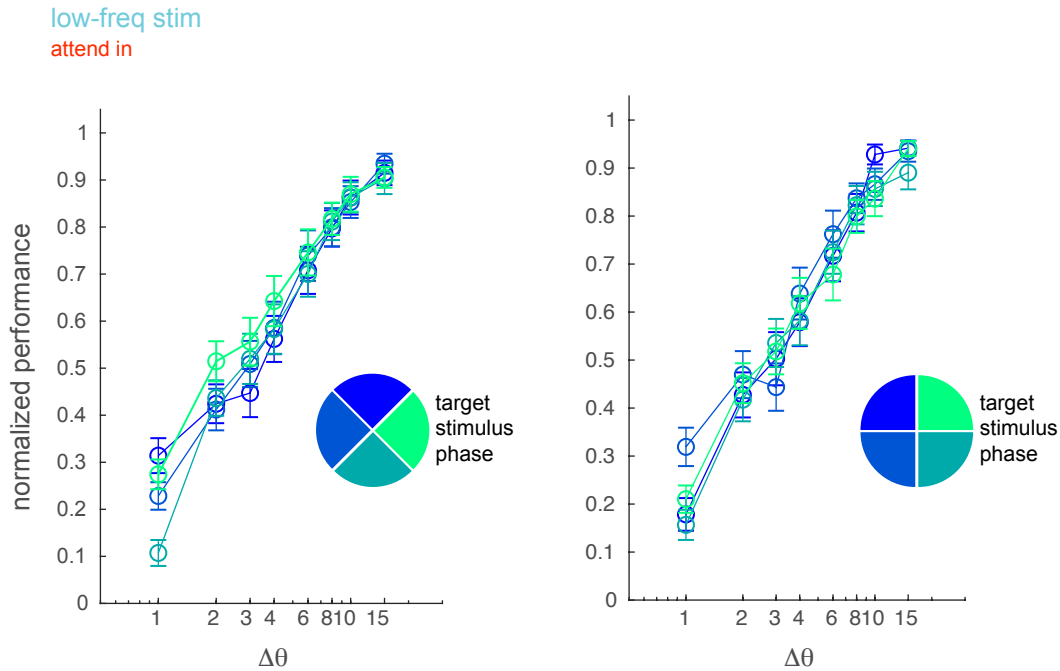

**Fig 4 - Supp 3. Behavioral performance is not affected by optical stimulation phase.** (A) Phase plots showing the distribution of target stimulus onset times with respect to the phase of the low-frequency (5Hz, left) and high-frequency (20Hz, right) optical stimulation. Mean  $\pm$  s.e.m. (B) Normalized performance (pooled across all behavioral sessions) as a function of target stimulus phase. The target stimulus onset times with respect to the phase of the low-frequency stimulation is binned into 4 phase bins (legend). The panels show two different bin arrangements.
