# Supplementary material for: Optogenetically induced low-frequency correlations impair perception
Source: eLife journal article supplement (doi:10.7554/elife.35123), 2019-02-22
Supplement: supp [file elife-35123-supp-v1.zip › elife_poa_e35123_Figure_4_figure_supplement_4.pdf]

Figure 4 - Supplementary 4 NANDY

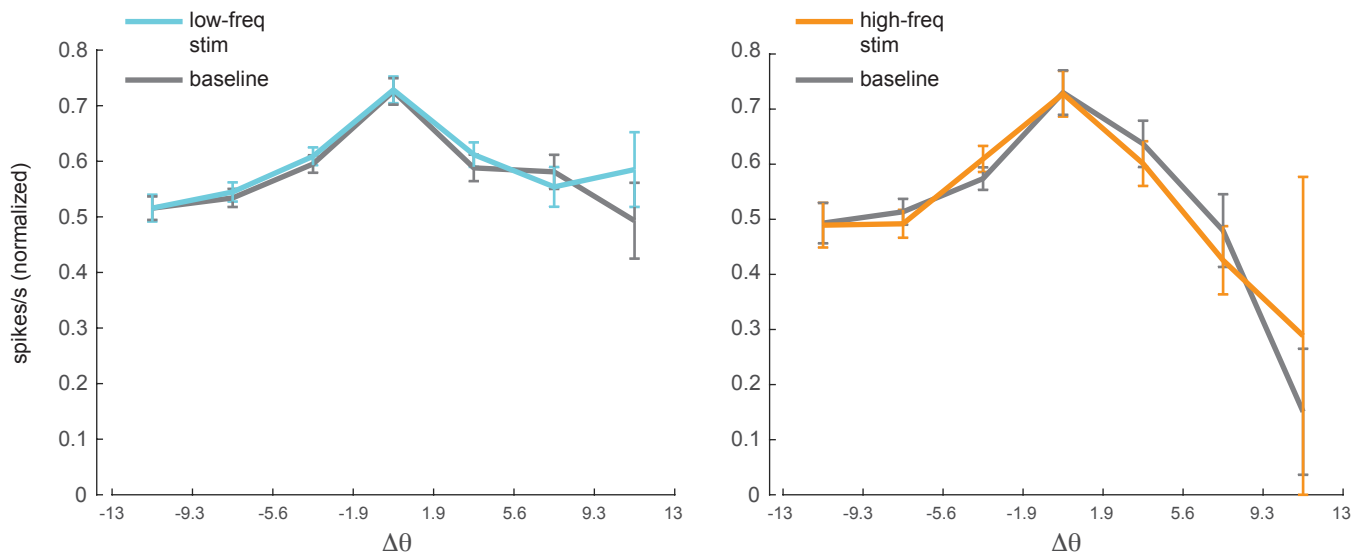

**Fig 4 - Supp 4. Optical stimulation does not change orientation tuning.** Orientation tuning curves for the neuronal population with and without optical stimulation (*left panel*, low-frequency stimulation condition, n=68 units; *right panel*, high-frequency stimulation condition, n=25 units). The spikes rates were normalized to peak response across stimulation conditions (optical stimulation and baseline no-stimulation conditions). The population tuning curves were plotted after aligning the peak response of each neuron to zero and binning the data into orientation bins. The x-axis shows the edges of the orientation bins. Mean  $\pm$  s.e.m.
