# Supplementary material for: Optogenetically induced low-frequency correlations impair perception
Source: eLife journal article supplement (doi:10.7554/elife.35123), 2019-02-22
Supplement: supp [file elife-35123-supp-v1.zip › elife_poa_e35123_Figure_6_figure_supplement_1.pdf]

Figure 6 - Supplementary 1 NANDY

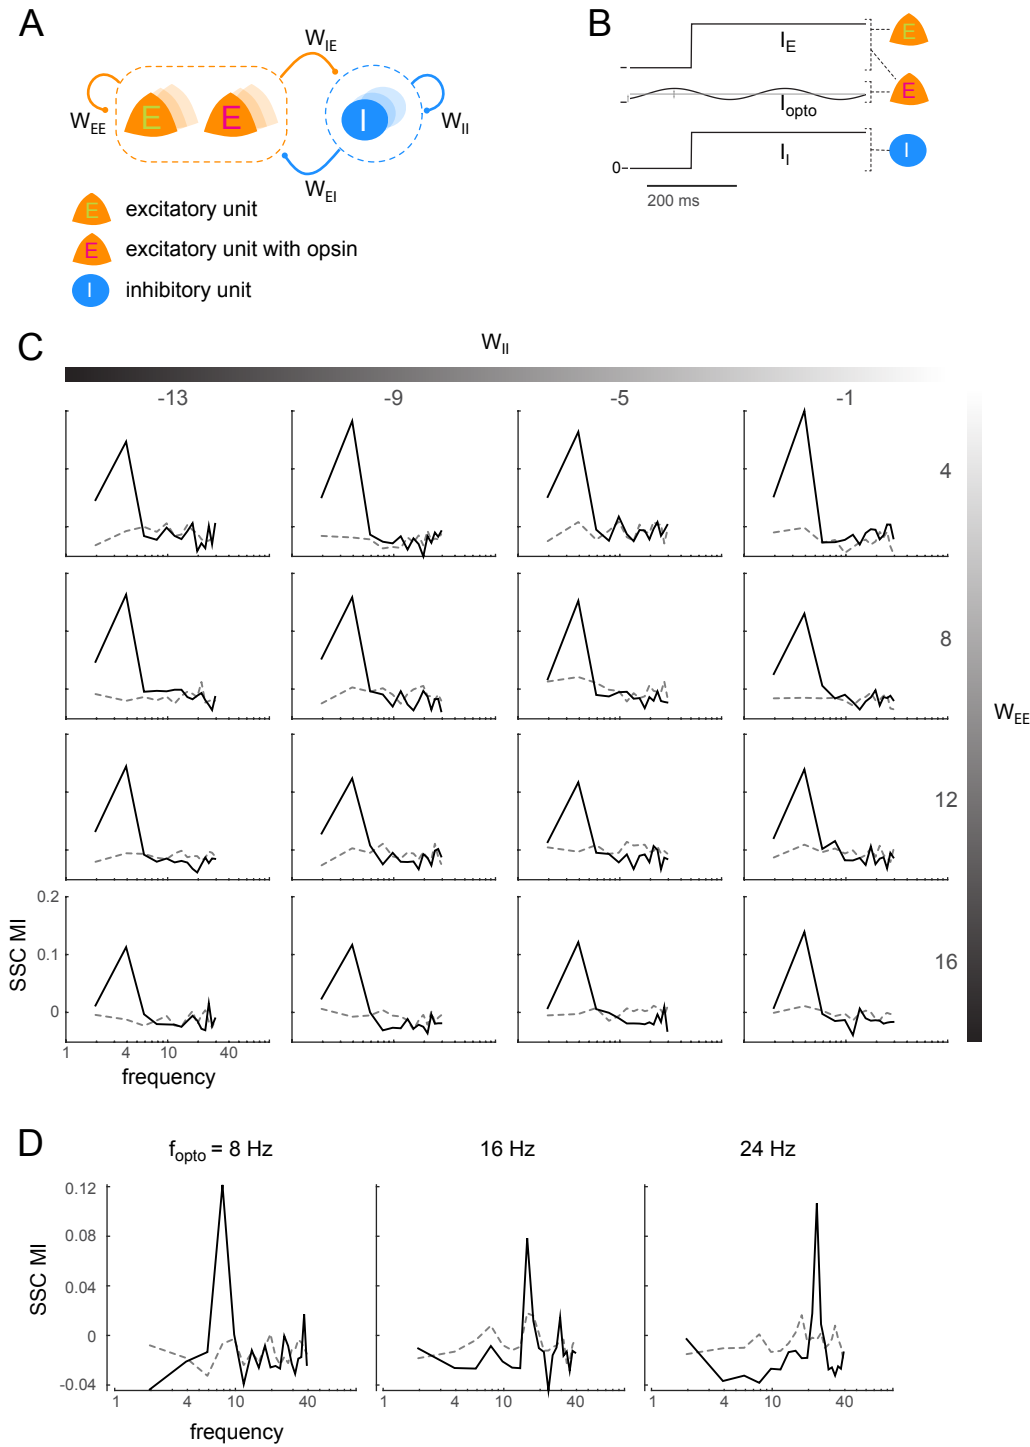

**Fig 6 - Supp 1. Induction of coherent activity in the E-I model is robust across network and stimulation parameters - I.** (A)-(B) same as Fig 6A-B. (C) Spike-spike coherence modulation index (SSC MI; see Fig 6D) as a function of varying the self-coupling parameters  $W_{EE}$  and  $W_{II}$ , keeping the other two parameters fixed ( $W_{IE}=4, W_{EI}=-18$ ). SSC MI exhibits a peak at the 4Hz optical stimulation frequency irrespective of the self-coupling parameters. The dotted lines represent the null SSC MI obtained by shuffling trial identities. (D) The peak SSC MI shifts with increasing optical stimulation frequency ( $f_{opto}$ , network parameters same as in Fig 5), indicating that the peak is not due to any intrinsic resonant activity in the network. Dotted lines same as in C.
