# Supplementary material for: Optogenetically induced low-frequency correlations impair perception
Source: eLife journal article supplement (doi:10.7554/elife.35123), 2019-02-22
Supplement: supp [file elife-35123-supp-v1.zip › elife_poa_e35123_Figure_6_figure_supplement_2.pdf]

Figure 6 - Supplementary 2 NANDY

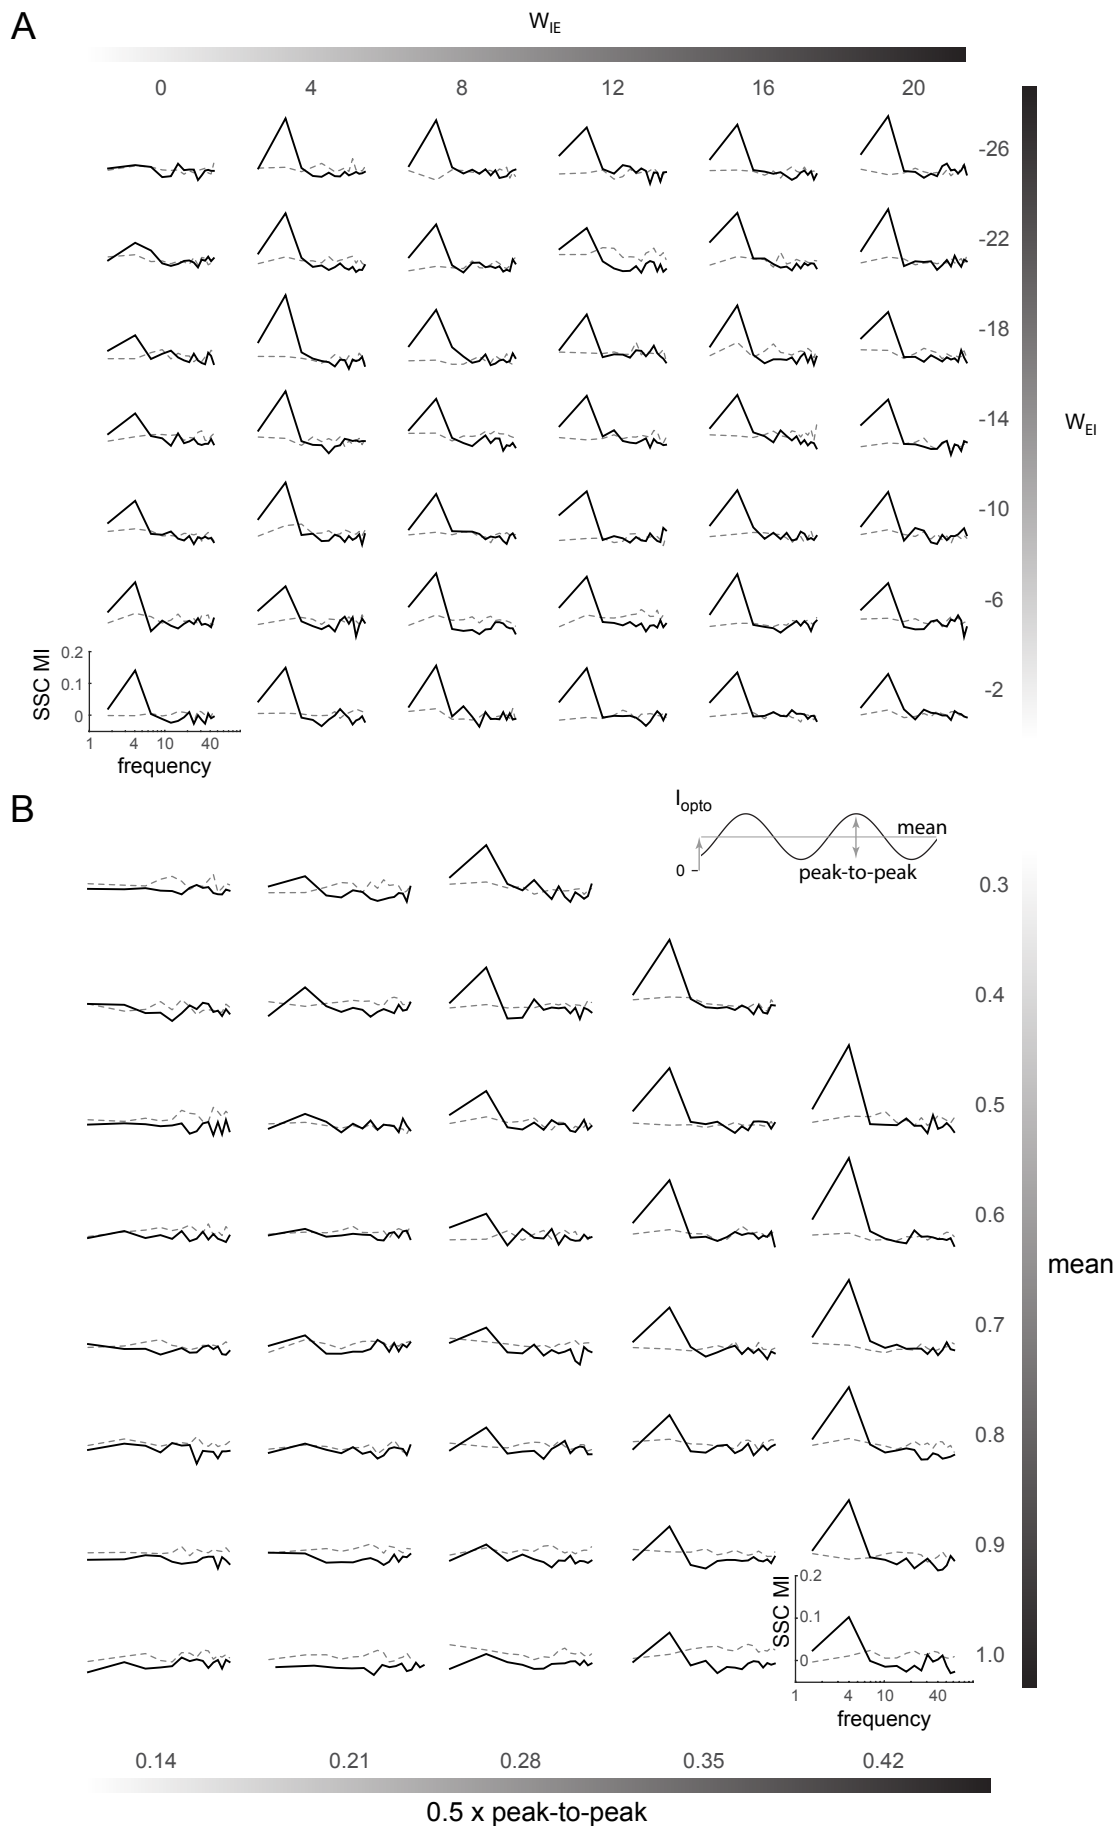

**Fig 6 - Supp 2. Induction of coherent activity in the E-I model is robust across network and stimulation parameters - II.** (A) Spike-spike coherence modulation index (SSC MI; see Fig 6D) as a function of varying the cross-coupling parameters  $W_{ie}$  and  $W_{ei}$ , keeping the other two parameters fixed ( $W_{ee}=16, W_{ii}=-1$ ). (B) SSC MI as a function of the mean and peak-to-peak variation of the 4Hz sinusoidal optical stimulation ( $I_{opto}$ ). Network parameters same as in Fig 6.
